## 1 **Loss of SORCS2 is associated with neuronal DNA double-strand breaks**

2 Katerina O. Gospodinova<sup>1</sup>, Ditte Olsen<sup>2</sup>, Mathias Kaas<sup>2</sup>, Susan M. Anderson<sup>1</sup>, Jonathan Phillips<sup>1</sup>, Rosie  
3 M. Walker<sup>1,3</sup>, Mairead L. Bermingham<sup>1</sup>, Abigail L. Payne<sup>1</sup>, Panagiotis Giannopoulos<sup>1</sup>, Divya Pandya<sup>1</sup>,  
4 Tara L. Spires-Jones<sup>4</sup>, Catherine M. Abbott<sup>1</sup>, David J. Porteous<sup>1</sup>, Simon Glerup<sup>2</sup>, Kathryn L. Evans<sup>1</sup>

5 1. Centre for Genomic and Experimental Medicine, University of Edinburgh, Edinburgh, EH4 2XU, UK

6 2. Department of Biomedicine, Aarhus University, Aarhus, 8000, Denmark

7 3. Chancellor's Building, 49 University of Edinburgh, Edinburgh, EH16 4SB, UK (current address)

8 4. Centre for Discovery Brain Sciences, UK Dementia Research Institute, University of Edinburgh,  
9 Edinburgh, EH8 9XD, UK

10

11 Katerina O. Gospodinova: [kgospodi@exseed.ed.ac.uk](mailto:kgospodi@exseed.ed.ac.uk) ; Ditte Olsen: [olsen@biomed.au.dk](mailto:olsen@biomed.au.dk); Mathias

12 Kaas [mko@biomed.au.dk](mailto:mko@biomed.au.dk); Susan M. Anderson [S.M.Anderson@ed.ac.uk](mailto:S.M.Anderson@ed.ac.uk); Jonathan Phillips

13 [Jonathan.Phillips@ed.ac.uk](mailto:Jonathan.Phillips@ed.ac.uk); Rosie M. Walker: [rwalke13@staffmail.ed.ac.uk](mailto:rwalke13@staffmail.ed.ac.uk); Mairead L.

14 Bermingham: [mairiad.bermingham@ed.ac.uk](mailto:mairiad.bermingham@ed.ac.uk); Abigail L. Payne: [abbiepayne22@hotmail.com](mailto:abbiepayne22@hotmail.com);

15 Panagiotis Giannopoulos: [s1582089@ed.ac.uk](mailto:s1582089@ed.ac.uk); Divya Pandya: [divyapandya@hotmail.co.uk](mailto:divyapandya@hotmail.co.uk); Tara L.

16 Spires-Jones: [tara.spires-jones@ed.ac.uk](mailto:tara.spires-jones@ed.ac.uk); Catherine M. Abbott: [c.abbott@ed.ac.uk](mailto:c.abbott@ed.ac.uk); David J.

17 Porteous: [david.porteous@ed.ac.uk](mailto:david.porteous@ed.ac.uk); Simon Glerup: [glерup@biomed.au.dk](mailto:glерup@biomed.au.dk); Kathryn L. Evans:

18 [Kathy.Evans@ed.ac.uk](mailto:Kathy.Evans@ed.ac.uk)

19

20 Corresponding Author: Kathryn L. Evans, Centre for Genomic and Experimental Medicine, University  
21 of Edinburgh, Edinburgh, EH4 2XU, UK +44 131 651 8747

22

23 **Abstract**

24 SORCS2 is one of five proteins that constitute the Vps10p-domain receptor family. Members of this  
25 family play important roles in cellular processes linked to neuronal survival, differentiation and  
26 function. Genetic and functional studies implicate SORCS2 in cognitive function, as well as in  
27 neurodegenerative and psychiatric disorders. DNA damage and DNA repair deficits are linked to  
28 ageing and neurodegeneration, and transient neuronal DNA double-strand breaks (DSBs) also occur  
29 as a result of neuronal activity. Here, we report a novel role for SORCS2 in DSB formation. We show  
30 that SorCS2 loss is associated with elevated DSB levels in the mouse dentate gyrus and that knocking  
31 out *SORCS2* in a human neuronal cell line increased Topoisomerase II $\beta$ -dependent DSB formation  
32 and reduced neuronal viability. Neuronal stimulation had no impact on levels of DNA damage,  
33 suggesting that the observed differences are unlikely to be the result of aberrant neuronal activity.  
34 Our findings are consistent with studies linking the VPS10 receptors and DNA damage to  
35 neurodegenerative conditions.

36

37 **Key words**

38 SORCS2, DNA double-strand breaks, neuronal activity, neurodegeneration

39

40 **Declarations**

41 **Funding**

42 This work was supported by University of Edinburgh internal funds in the form of a PhD studentship,  
43 grants from Alzheimer's Research UK (ARUK-PPG2019B-015 and ARUK-NC2019-SCO) and by the UK  
44 Dementia Research Institute, which receives its funding from UK DRI Ltd funded by the UK Medical  
45 Research Council, Alzheimer's Society and Alzheimer's Research UK, and the European Research

46 Council (ERC) under the European Union's Horizon 2020 research and innovation programme (Grant  
47 agreement No. 681181).

#### 48 **Competing interests**

49 Although not related to the present study, SG is a shareholder of Muna Therapeutics and Teitur  
50 Trophics, both involved in developing therapies directed at SorCS2. The remaining authors declare  
51 that they have no competing interests.

#### 52 **Availability of data and materials**

53 Please contact author for data requests.

#### 54 **Code availability**

55 Not applicable.

#### 56 **Authors' contributions**

57 KOG and KLE conceived and planned the experiments. KOG performed the majority of the  
58 experiments and data analysis. SG provided the mice and DO and MK performed the behavioural  
59 experiments. SMA, JP, AP, PG and DP contributed to the execution of the experiments. RMW and  
60 MLB performed the statistical analysis of the mouse data. TSJ provided materials and support during  
61 assay optimisation. SG, CMA, TSJ and DJP contributed through strategic discussions. KOG and KLE  
62 wrote the manuscript with input from all authors.

#### 63 **Ethics approval**

64 All experiments were approved by the Danish Animal Experiments Inspectorate under the Ministry  
65 of Justice (Permits 2011/561-119, 2016-15-0201-01127 and 2017-15-0201-01192) and carried out  
66 according to the ARRIVE guidelines.

#### 67 **Consent to participate**

68 Not applicable.

69 **Consent for publication**

70 Not applicable.

71

72

73

74

75

76

77

78

79

80

81

82

83

84

85

86

87

## 88 Introduction

89 *SORCS2* is a member of the VPS10p-domain receptor, or sortilin, family. The family comprises five  
90 multifunctional neuronal receptors: sortilin; *SORLA* and *SORCS1-3*, which are characterised by  
91 possession of a vacuolar protein sorting (VPS) 10p domain (Hermeijer 2009). All family members are  
92 involved in intracellular sorting and trafficking of various neurotrophic factors, transmembrane  
93 receptors and synaptic proteins, linking them to a broad range of cellular processes, including  
94 neuronal function, differentiation and synaptic plasticity (Glerup et al 2014a).

95 Genetic and functional analyses implicate the VPS10p-domain receptors in cognitive functions and a  
96 wide range of neurodegenerative and psychiatric disorders. Interrogation of the GWAS catalog  
97 (<https://www.ebi.ac.uk/gwas/>) indicates that multiple SNPs in *SORCS2* are involved in epistatic  
98 interactions that are associated ( $p \leq 5 \times 10^{-8}$ ) with paired helical filament tau (PHF-tau) levels (Wang et  
99 al 2020). Genetic variants in *SORCS2* are also significantly associated ( $p \leq 5 \times 10^{-8}$ ) with alcohol  
100 withdrawal (Smith et al 2018) and risk-taking behaviour (Karlsson Linnér et al 2019). In addition,  
101 there are suggestive associations ( $5 \times 10^{-8} < p < 1 \times 10^{-5}$ ) with ADHD (Alemany et al 2015), anorexia  
102 nervosa (Duncan et al 2017), response to antidepressants (Fabbri et al 2018), depressive and manic  
103 episodes in bipolar disorder (Fabbri and Serretti 2016), memory performance (Greenwood et al  
104 2019), and intelligence (Davies et al 2018). Elevated *SORCS2* levels have been detected in the brains  
105 of epileptic patients, as well as in the hippocampi of wild-type mice subjected to pentylenetetrazole  
106 (PTZ)-induced kindling, a model of epilepsy (Malik et al 2019). Meanwhile, application of PTZ-  
107 induced kindling in animals lacking *Sorcs2* increased the levels of oxidative stress and led to an  
108 exacerbated oxidative stress response in primary neurons (Malik et al 2019). Increased *SORCS2*  
109 expression has also been observed in response to application of the cortisol analogue,  
110 dexamethasone (DEXA), as well as following alcohol exposure in a human neuroblastoma cell line  
111 (Smith et al 2018). In mice, loss of *Sorcs2* has been linked to a decreased phenotypic preference for

112 alcohol and decreased alcohol withdrawal symptoms (Olsen et al 2019), suggesting a general role of  
113 the receptor in the cellular and behavioural response to multiple stressors.

114 During mouse development (E15.5), *Sorcs2* is expressed in the ventral hippocampus and in tyrosine-  
115 hydroxylase-positive (TH+) neurons of the midbrain. In the adult mouse brain, *Sorcs2* is strongly  
116 expressed in hippocampal, striatal and cortical neurons (Deinhardt et al 2011; Glerup et al 2014b;  
117 Glerup et al 2016). At the cellular level, in the hippocampus SorCS2 is located at the post-synaptic  
118 density (PSD) of dendrites and within synaptic vesicles (Glerup et al 2016; Ma et al 2017). Through its  
119 interactions with the BDNF receptor tyrosine kinase, TrkB, and the pro-BDNF receptor p75<sup>NTR</sup>, it is  
120 implicated in the induction of NMDA-dependent long-term potentiation (LTP) and depression (LTD)  
121 in the hippocampus, respectively (Glerup et al 2016). Moreover, SorCS2 traffics TrkB to the PSD in an  
122 activity-dependent manner, thus playing a role in synaptic tagging and synaptic potentiation  
123 maintenance (Glerup et al 2016). The receptor has been also implicated in the trafficking of NMDA  
124 receptor subunits to dendritic and synaptic surfaces in medium spiny neurons of the striatum (Ma et  
125 al 2017) and in pyramidal neurons of the CA2 (Ma et al 2017; Yang et al 2020). In keeping with the  
126 above findings, *Sorcs2*<sup>-/-</sup> mice exhibit learning and memory deficits (Glerup et al 2016) and  
127 hyperactive behaviour on exposure to novelty (Olsen et al 2021).

128 DNA double-strand break (DSB) formation has been previously hypothesised to be involved in  
129 learning and memory in wild-type mice via a behavioural task that involved exploration of a novel  
130 environment (Suberbielle et al 2013; Madabhushi et al 2015). Suberbielle *et al.* (2013) (Suberbielle et  
131 al 2013) reported the somewhat surprising finding of increased DSB formation in the hippocampus  
132 and parietal cortex of adult wild-type mice following exploration of a novel environment. DSBs were  
133 most abundant in the DG, an important area for learning and memory. The breaks were repaired  
134 within 24 hours leading the authors to suggest that transient break formation plays a role in  
135 chromatin remodelling and regulation of gene expression necessary for learning and memory  
136 formation. Further experiments involving direct activation of the visual cortex and the striatum via

137 exposure to visual stimuli or optogenetic stimulation, respectively, showed that increases in  
138 neuronal activity in the absence of the behavioural paradigm were sufficient for inducing DSBs.  
139 Subsequent work by others showed that neuronal activity *in vivo* (induced via a contextual fear  
140 conditioning training paradigm) and *in vitro* also resulted in higher levels of DSBs than was seen in  
141 controls (Madabhushi et al 2015). Neuronal activity-induced DSBs were found to be located in the  
142 promoters of a subset of early-response genes and mediated by the type II topoisomerase,  
143 Topoisomerase II $\beta$  (Topo II $\beta$ ): knockdown of Topo II $\beta$  attenuated both DSB formation and early-  
144 response gene expression following neuronal stimulation (Madabhushi et al 2015). In keeping with  
145 these findings, *in vitro* pharmacological stimulation of neuronal activity has been shown to be  
146 associated with increased DSB formation (Suberbielle et al 2013; Madabhushi et al 2015).

147 Given the changes in synaptic plasticity and the altered response to novelty and to stress observed in  
148 the *Sorcs2*<sup>-/-</sup> mice, we hypothesised that loss of the receptor may lead to alterations in the number  
149 of DNA DSBs at baseline, following exploration of a novel environment and/or following a recovery  
150 period. In keeping with previous data, we detected an increase in DSB formation in the hippocampus  
151 of wild-type mice following exploratory activity and repair of these breaks after a recovery period.  
152 Compared to wild-type mice, *Sorcs2* knock-out mice had higher levels of DSBs in the DG at baseline  
153 with no differences seen after the novel environment or on recovery. Next, we investigated whether  
154 this difference would also be observed in human neurons lacking SORCS2. We used CRISPR/Cas9  
155 genome editing to delete the gene from Lund Human Mesencephalic (LUHMES) human neurons  
156 (Lotharius et al 2002; Scholz et al 2011). We found that neurons from *SORCS2* knock-out lines had  
157 more DNA DSBs and were characterised by decreased viability compared to wild-type lines. There  
158 was no difference in the number of breaks observed in wild-type and knock-out lines following  
159 stimulation of neuronal activity.

160

161 **Materials and Methods**

162 Compounds and antibodies

163 Primary antibodies used in this study: polyclonal sheep anti-SORCS2 (AF4238, R&D Systems),  
164 monoclonal mouse anti- $\gamma$ H2A.X (JBW301, Millipore) and polyclonal rabbit anti-53BP1 (NB100304,  
165 Novus Biologicals). Secondary antibodies: rabbit anti-mouse Immunoglobulins/HRP (P0260, Dako),  
166 rabbit anti-sheep Immunoglobulins/HRP (P0163, Dako), Alexa Fluor® 488 donkey anti-mouse IgG  
167 (H+L) (A21202, Thermo Scientific) and Alexa Fluor® 568 donkey anti-rabbit IgG (H+L) (A21207,  
168 Thermo Scientific). Etoposide was purchased from Sigma (E1383).

169 Animals

170 Mice were housed at the animal facility at Aarhus University, in groups of up to five mice per cage  
171 with a 12-h light/12-h dark schedule and fed standard chow (1324, Altromin) and water *ad libitum*.  
172 Cages were cleaned and supplied with bedding and nesting material every week. *Sorcs2*<sup>-/-</sup> mice had  
173 been backcrossed for ten generations into C57BL/6J Bomtac background (Glerup et al 2014b). All  
174 experiments were approved by the Danish Animal Experiments Inspectorate under the Ministry of  
175 Justice (Permits 2011/561-119, 2016-15-0201-01127 and 2017-15-0201-01192) and carried out  
176 according to the ARRIVE guidelines. Behavioural experiments were carried out using sex- and age-  
177 matched mice (male, 5-6 months old). Each of the behavioural tests described below were carried  
178 out using naïve animals in a randomized order by an investigator blinded to the mouse genotype. No  
179 animals were excluded from the subsequent analysis.

180 Exploration of a novel environment

181 Mice in the control group (here defined as 'home cage') were kept in their original cages. Mice in the  
182 novel environment ('novel environment') and the recovery from the novel environment ('recovery')  
183 groups were transferred to the testing room, where they were individually exposed to a novel  
184 environment. The novel environment consisted of an Open Field Arena with four different novel  
185 objects and mint-like odour. Individual mice were allowed to explore the novel environment for 2h.



186 After the novel environment exploration, the mice in the novel environment group were sacrificed,  
187 while the mice in the recovery group were returned to their home cages, where they recovered from  
188 the behavioural task for 24h before being sacrificed. The mice from the home cage group were  
189 sacrificed at the same time point.

#### 190 Perfusion and tissue processing

191 Mice were perfused transcardially with cold PBS containing heparin (10,000 U/L), followed by ice-  
192 cold 4% paraformaldehyde (PFA) in phosphate-buffered saline (PBS). Whole brains were dissected  
193 and post-fixed overnight in 4% PFA in PBS. Following post-fixation, brains were rinsed in sterile PBS  
194 and cryoprotected first in 10% sucrose and then in 30% sucrose at 4°C until the tissue sank to the  
195 bottom of the tube. Brains were subsequently embedded in OCT compound on dry ice and stored at  
196 -80°C. Coronal sections (14µm thick) containing the brain areas of interest (i.e., DG at bregmas: -  
197 1.755, -2.155 and -2.555; CA2 and CA3 at bregmas: -1.755 and -2.1550) were obtained and mounted  
198 on Superfrost slides (Suppl. Fig. 1). Slides were stored at -80°C.

#### 199 LUHMES culture

200 LUHMES is a karyotypically normal human foetal mesencephalic cell line conditionally immortalised  
201 with the v-myc oncogene. Proliferation of the neuronal precursor cells can be terminated by adding  
202 tetracyclin, thus halting v-myc expression. Subsequent addition of GDNF results in robust  
203 differentiation into post-mitotic dopaminergic neurons within five days. LUHMES cells (ATCC, RRID:  
204 CVCL\_B056) were grown and differentiated as described previously (Scholz et al 2011). Briefly, cell  
205 culture dishes were pre-coated with PLO (1mg/ml; P3655, Sigma) and fibronectin (1mg/ml; F1141,  
206 Sigma) in distilled H<sub>2</sub>O (dH<sub>2</sub>O) for at least 3h at 37°C. Following incubation, the coating solution was  
207 aspirated, and plates/flasks were washed two times with dH<sub>2</sub>O and completely air dried before cell  
208 seeding. Prior to differentiation, LUHMES cells were maintained in proliferation medium consisting  
209 of Advanced DMEM/F12 (12634028, Life Technologies), L-glutamine (200mM; 25030081, Life  
210 Technologies), N2 supplement (100x; 17502-048, Life Technologies) and b-FGF (160µg/ml; 571502,

211 Biologend). Experiments were conducted after 6 or 14 days of differentiation initiated by growing  
212 cells in differentiation media consisting of Advanced DMEM/F12, L-glutamine (200mM), N2  
213 supplement (100x), cAMP (100mM; D0627, Sigma), Tetracycline hydrochloride (1mg/ml; T7660,  
214 Sigma) and recombinant human GDNF (20µg/ml; 212-GD-010, R&D).

#### 215 CRISPR/Cas9 Genome Editing

216 Guide RNAs (gRNAs) targeting *SORCS2* exon 1 or exon 3 were designed using two independent  
217 online tools: the Zhang Lab CRISPR Design website (<https://crispr.mit.edu>) and CHOPCHOP  
218 (<https://chopchop.cbu.uib.no/>), and were selected based on their on/off-target activity. The oligos  
219 were phosphorylated and subsequently cloned into the px458 vector, co-expressing the Cas9  
220 endonuclease and GFP (RRID: Addgene\_48138). Low passage LUHMES cells were fed with fresh  
221 proliferating media 2h prior to transfection. Cells were dissociated using TrypLE (12605036, Thermo  
222 Scientific), counted and  $2 \times 10^6$  cells were transfected using the Basic Nucleofector kit for primary  
223 neurons (VAPI-1003, Lonza) and the D-33 programme on the Amaxa Nucleofector II B device (Amaxa  
224 Biosystems). 500µl of pre-warmed RPMI media (BE12-752F, Lonza) was added following  
225 nucleofection. The cells were then incubated at 37°C for 5min and gently added to precoated 6-well  
226 plates containing 2ml of freshly made proliferation medium. 2µg of the Cas9 plasmid containing the  
227 gRNA of interest were used in each transfection. Empty vector (EV) control lines were generated by  
228 transfecting proliferating LUHMES at an equivalent passage number with the px458 vector alone.

229 Forty-eight hours following transfection, cells were lifted as described before and centrifuged at 90g  
230 for 10min. The cell pellets were resuspended in 500µl of warm PBS and GFP+ cells were sorted by  
231 FACS into pre-coated 96-well plates, containing 100µl of freshly prepared proliferation medium.  
232 After seven days, 100µl of fresh proliferation medium was added to each well, and three days later  
233 single cell colonies were identified. At this stage, one third of the cells was kept for genotyping, and  
234 the rest were split into two wells of a 24-well plate for further expansion.

#### 235 CRISPR/Cas9 sgRNAs and Primer Sequences

236 gRNA *SORCS2* exon 1: CGGAGTGGCTTCGCGGGCGC

237 gRNA *SORCS2* exon 3: CCGTCATCGACAATTTCTAC

238 *SORCS2* exon 1 Forward primer: CCTTTCTCTGCGCTCTCG

239 *SORCS2* exon 1 Reverse primer: CCGCCCCTGATGACCATA

240 *SORCS2* exon 3 Forward primer: CAGAGTGCCCAGGACTGTAC

241 *SORCS2* exon 3 Reverse primer: ATGTGCCCTAGGTATGCAGG

242 Western blotting

243 Cells were lysed in ice cold 1% Triton lysis buffer (20mM Tris-HCl pH 8.0, 10mM EDTA, 1% Triton X-  
244 100 and 1x protease inhibitor cocktail (5892970001, Roche) ) and protein concentration was  
245 measured using Bio-Rad BSA protein assay (5000116, Bio-Rad). Protein lysates were loaded on  
246 NuPAGE Tris-acetate 3-8% precast gels (EA03752BOX, Life Technologies) and ran at 150V for 1.5h.  
247 Gels were transferred onto PVDF membranes at 30V for 1.5h. Membranes were blocked in 5% milk  
248 in 0.2% Tween-20 in TBS for 1h at room temperature and probed with primary antibodies against  
249 *SORCS2* (1:750; AF4238, R&D Systems) and GAPDH (1:10,000; MAB374, Merck) diluted in blocking  
250 solution overnight at 4°C. After washes (3x 10min) in 0.2% Tween-20 in TBS, membranes were  
251 incubated with secondary HRP-conjugated antibodies diluted 1:10,000 in blocking solution for 1h at  
252 room temperature. After another three washes with TBS-0.2% Tween-20, blots were visualised using  
253 the Pierce ECL Plus Western Blotting Substrate (11527271, Thermo Scientific) and exposed using  
254 autoradiography film.

255 Immunofluorescence staining

256 Slides containing brain sections were thawed at room temperature, incubated for 10min in 4% PFA  
257 in PBS and then thoroughly washed for 30min in PBS containing 100mM glycine (1042011000, EMD  
258 Millipore) followed by 30min in PBS. Heat-mediated antigen retrieval was performed by placing

259 slides in 1x sodium citrate buffer (PHR1416, Sigma), pH 6.0, and pulse-heated for 20min in the citrate  
260 buffer in the microwave. Slides were allowed to cool for 20min inside the microwave, followed by  
261 30min at room temperature. Slides were then washed 3 times (15min each wash) in PBS and  
262 incubated in blocking solution for 1.5h at room temperature. Blocking solution contained 5% normal  
263 donkey serum (D9663, Sigma), 1% BSA (421501J, VWR), 0.1% Triton-X and 0.05% Tween-20 in PBS.  
264 Slices were incubated with monoclonal mouse anti- $\gamma$ H2A.X primary antibody (1:50; JBW301,  
265 Millipore) in 5% normal donkey serum and 1% BSA in PBS at 4°C overnight. On the following day,  
266 slides were further incubated for 30min at 37°C and washed 3 times in PBS (15min each wash).  
267 Slides were then incubated with 3% Sudan black solution in 70% ethanol for 10min at room  
268 temperature. After 3 rinses in dH<sub>2</sub>O, slides were incubated with corresponding Alexa-conjugated  
269 secondary antibody (1:500; A21202, Thermo Fisher) diluted in 5% normal donkey serum in PBS for  
270 1h at 37°C. Slides were then washed 3 times in PBS, followed by 3 times in dH<sub>2</sub>O (15min each wash).  
271 DAPI (D9542, Sigma) diluted 1:1,000 in PBS was subsequently applied for 10min and washed off with  
272 PBS (3 washes, 5min each). Sections were mounted in ProLong Gold antifade mountant (P36930,  
273 Thermo Scientific).

#### 274 Immunocytochemistry and drug treatments

275 Pre-differentiated (day 2) LUHMES were plated down ( $0.15 \times 10^6$  cells per well) and grown on acid-  
276 etched coverslips, placed in 24-well plates and coated with PLO and fibronectin, followed by Geltrex  
277 (A1413201, Thermo Scientific). Day 14 LUHMES neurons were fixed with 4% PFA for 15min, rinsed  
278 with PBS and stored in TBS at 4°C until required. Neurons were permeabilised in 0.1% TBS-Triton X  
279 for 5min. Following three rinses with TBS, coverslips were incubated in blocking solution (5% normal  
280 donkey serum in 0.1% TBS- Tween) for 1h at room temperature and then overnight at 4°C with  
281 mouse monoclonal anti- $\gamma$ H2A.X primary antibody (1:400; JBW301, Millipore) and rabbit polyclonal  
282 anti-53BP1 primary antibody (1:1000, NB100304, Novus Biologicals) diluted in blocking solution. The  
283 next day, neurons were washed with 0.1% Tween-TBS (3x10min) and incubated with corresponding

284 secondary antibodies for 1h at room temperature. Secondary antibodies were Alexa Fluor 488-  
285 donkey anti-mouse IgG (1:300; A21202, Thermo Scientific) and Alexa Fluor 596-donkey anti-rabbit  
286 IgG (1:500; A21207, Thermo Scientific), and were diluted, together with DAPI (1:1,000; D9542,  
287 Sigma), in 4% normal donkey serum in 0.1% TBS- Tween. Cells were washed with TBS (3x10min) and  
288 mounted with ProLong Gold antifade mountant (P10144, Thermo Scientific). For the etoposide  
289 treatment experiments, LUHMES neurons were incubated with 0.5 $\mu$ M etoposide (E1383, Sigma) for  
290 4h at 37°C prior to fixation.

#### 291 Image acquisition and analysis

292 All imaging and counting procedures were performed blind to genotype. Image analysis was  
293 performed using the software package Fiji. Z-stacked confocal images, with a step size of 0.25 $\mu$ m  
294 (brain sections) or 1 $\mu$ m (LUHMES neurons), were acquired on a Nikon STORM/A1+ microscope at  
295 60x (brain sections) or 100x (LUHMES neurons) magnification, using the NIS Elements software. The  
296 optimal laser intensity and gain that gave no signal in the no-primary antibody controls, were  
297 established and kept constant for all subsequent analyses. Three images of each region of interest  
298 were obtained from each mouse. The number of neurons with one or more  $\gamma$ H2A.X-positive foci, as  
299 well as the total number of nuclei within a given area (approximately 200 nuclei on average) were  
300 counted manually and the percentage of  $\gamma$ -H2A.X-positive nuclei determined for each image. In the  
301 case of LUHMES neurons, nine independent wild-type and nine independent *SORCS2* knock-out lines  
302 were analysed. Approximately 100 nuclei (from four images belonging to different regions of the  
303 same coverslip) were counted for each line, and the number of  $\gamma$ H2A.X/53BP1-positive foci per  
304 nucleus was calculated.

#### 305 Quantitative reverse transcriptase PCR (qRT-PCR)

306 Cell pellets from day 14 LUHMES neurons were resuspended in RLT buffer (Qiagen) with 10% (v/v) 2-  
307 mercaptoethanol. Total RNA was extracted using the RNeasy mini kit (Qiagen), and 1 $\mu$ g per sample  
308 was reverse transcribed with Multiscribe Reverse Transcriptase using random hexamers in a 80 $\mu$ l

309 reaction. Controls, in which 25ng RNA of each sample was used to make cDNA in the absence of the  
310 Multiscribe Reverse Transcriptase, were included to detect genomic contamination.

311 PCR amplification of the cDNA obtained for each sample was quantified using the TaqMan®  
312 Universal PCR Mix No AmpErase® UNG (Life Technologies), and the threshold cycle (Ct) was  
313 determined using the Applied Biosystems 7900HT Fast Real-Time PCR System and the corresponding  
314 SDS software. TaqMan probes were used for the detection of *TOP2B* and eight reference genes  
315 (*CYC1*, *ERCC6*, *SDHA*, *TOP1*, *RPLPO*, *SCLY*, *TBP* and *UBE4A*). The GeNorm software was used to  
316 identify the most stably expressed reference genes (*SDHA* and *UBE4A*). A standard curve, generated  
317 from a dilution series, was run for *TOP2B* and the reference genes. The baseline and Ct values were  
318 determined for each gene and expression levels were calculated using the standard curve method  
319 for absolute quantification, where unknowns are compared to the generated standard curve and  
320 values are extrapolated. *TOP2B* expression values were subsequently normalised to the geometric  
321 mean of the reference genes.

#### 322 Viability assay

323 Neuronal viability was assessed using the Alamar Blue assay (DAL1025, Thermo Scientific). This assay  
324 was chosen as: 1) it does not interfere with cell functioning and 2) it is not an end-point assay, i.e. it  
325 allows viability to be measured at multiple time points (Rampersad 2012). Viability was measured at  
326 day 6 and day 14 from an equivalent number of neurons ( $0.25 \times 10^6$ ) per line by replacing the medium  
327 with freshly made differentiation medium containing 10% (v/v) Alamar Blue solution. Cells were  
328 incubated with the Alamar Blue solution for 2h, after which the solution was transferred to a new  
329 24-well plate and fluorescence measured in a FLUOstar OMEGA plate reader using an excitation  
330 wavelength of 540-570nm, and an emission wavelength of 580-610nm.

#### 331 Statistical analysis

332 Statistical analyses were performed using GraphPad Prism. Differences between two means were  
333 assessed using unpaired Student's t-test, and among multiple means by one- or two-way ANOVA,  
334 followed by Tukey's, Sidak's or Dunnett's post hoc tests. Sample sizes were determined based on  
335 previously reported findings (Suberbielle et al 2013) or pilot experiments. Null hypotheses were  
336 rejected when  $p < 0.05$ .

337

### 338 **Results**

339 Our goals were to investigate i) whether we replicated the previous finding that exploration of a  
340 novel environment led to a temporary increase in the number of DSBs detected in the mouse brain  
341 and ii) whether deletion of *Sorcs2* in mice leads to higher levels of DSB formation upon exploration  
342 of a novel environment and/or a deficit in break repair (Fig. 1a). The novel environment paradigm  
343 comprised three groups of mice (5-6 months of age): those that a) remained in their home cage  
344 (baseline group); b) explored a novel environment (novel environment group) and c) explored a  
345 novel environment, followed by a recovery period in the home cage (recovery group), before they  
346 were sacrificed. As described previously (Suberbielle et al 2013), the proportion of neurons positive  
347 for  $\gamma$ H2A.X (a widely used marker of DNA DSBs in neurons and other cell types) was determined in  
348 three brain regions (DG, CA2 and CA3 of the hippocampus, Suppl. Fig. 2; Suppl. Table 1). Two-way  
349 ANOVAs were performed for each brain region to assess the impacts of genotype and environment.  
350 In agreement with a previous report (Suberbielle et al 2013), exposing mice to a novel environment  
351 had a significant effect on the percentage of  $\gamma$ H2A.X-positive nuclei detected in the DG and the CA2,  
352 while the result was marginal in the CA3 region of the hippocampus (DG:  $F_{2,12} = 24.09$ ,  $p < 0.0001$ ,  
353 CA2:  $F_{2,12} = 7.122$ ,  $p = 0.0091$ , CA3:  $F_{2,12} = 3.672$ ,  $p = 0.0570$ ; Fig. 1b). Post-hoc analysis of the DG  
354 data obtained from the wild-type mice indicated that there were significantly more DSBs in the novel  
355 environment group compared to the baseline ( $p < 0.0001$ ) and recovery ( $p = 0.0025$ ) groups (Fig. 1b).  
356 In the CA2, the wild-type mice exposed to the novel environment also had significantly more DSBs

357 than the corresponding baseline group ( $p = 0.0445$ ), but a significant difference was not seen in the  
358 novel environment versus recovery condition ( $p = 0.1004$ ) (Fig. 1b). In contrast, there were no  
359 significant differences in the percentage of  $\gamma$ H2A.X-positive nuclei across the three experimental  
360 groups in any of the brain regions examined in the *Sorcs2*<sup>-/-</sup> mice (DG:  $F_{1,12} = 2.974$ ,  $p = 0.1103$ ; CA2:  
361  $F_{1,12} = 0.6495$ ,  $p = 0.4360$ ; CA3:  $F_{1,12} = 1.224$ ,  $p = 0.2902$ ). While no main effect of the genotype was  
362 observed in any region (DG:  $p = 0.1103$ ; CA2:  $p = 0.4360$ ; CA3:  $p = 0.2902$ ), in the DG, we detected a  
363 significant genotype-environment interaction ( $F_{2,12} = 8.19$ ,  $p = 0.0057$ ). Visual inspection of the  
364 plotted data (Fig. 1b) suggested, and post-hoc analysis showed, that the genotype-environment  
365 interaction was driven by a greater number of breaks at baseline in the mutant compared to the  
366 wild-type group (Fig. 1b,  $p = 0.0232$ ). Significant interactions were not observed in the CA2 ( $F_{2,12} =$   
367  $1.253$ ,  $p = 0.3205$ ) or the CA3 ( $F_{2,12} = 1.834$ ,  $p = 0.2019$ ) regions for this or any other environmental  
368 comparison.

369 We next sought to replicate the finding of a higher number of breaks at baseline in the DG of the  
370 *Sorcs2*<sup>-/-</sup> mice using an independent set of age and sex-matched wild-type and *Sorcs2*<sup>-/-</sup> mice. As  
371 before, we detected significantly higher levels of DSBs in the *Sorcs2*<sup>-/-</sup> mice ( $t_{10} = 2.786$ ,  $p = 0.0193$ ;  
372 Fig. 1c).

373 Having determined that the *Sorcs2*<sup>-/-</sup> mice had higher levels of DNA DSBs at baseline we set out to  
374 determine whether this phenotype was also present in human neurons lacking *SORCS2*. We used  
375 CRISPR/Cas9 genome editing (Fig. 2a) to delete the gene in the human neuronal cell line, LUHMES, a  
376 karyotypically normal foetal mesencephalic cell line that can be robustly differentiated into post-  
377 mitotic dopaminergic neurons, with the majority of cells generating trains of spontaneous action  
378 potentials after 10-12 days of differentiation (Scholz et al 2011). Loss of *SORCS2* expression was  
379 shown by western blotting (Fig. 2b). Nine independent lines generated using two different gRNAs  
380 (four produced using a gRNA targeting exon 1 and five from the exon 3 gRNA) were used in all  
381 subsequent analyses.



382 To evaluate the effect of knocking out *SORCS2* on DNA DSB formation in human neurons, we stained  
383 untreated control (consisting of wild-type (WT) and empty vector (EV) lines) and *SORCS2* knock-out  
384 LUHMES neurons (day 14) for  $\gamma$ H2A.X and 53BP1. The latter protein is quickly recruited to DSB sites,  
385 where it binds to  $\gamma$ H2A.X and acts as a scaffold for the binding of additional DNA repair proteins from  
386 the non-homologous end joining (NHEJ) pathway, the main DNA repair pathway in post-mitotic cells  
387 (Firsanov et al 2011). As previously reported for neurons (Crowe et al 2006), more than 90% of the  
388 analysed neurons (wild-type and knock-out) had fewer than three double positive foci per nucleus,  
389 with the majority of nuclei having no foci (Figure 3A; top row). There was no significant difference in  
390 the number of foci per nucleus between control and *SORCS2* knock-out neurons ( $t_{16} = 0.4664$ ,  $p =$   
391  $0.6472$ ; Fig. 3b). No significant difference was observed also between the WT and EV lines ( $t_7 =$   
392  $0.2396$ ,  $p = 0.8175$ ; Suppl. Fig. 3a), as well as between the *SORCS2* KOs generated by targeting exon  
393 1 and exon 3 ( $t_7 = 0.293$ ,  $p = 0.7780$ , Suppl. Fig. 3b). As DNA DSBs are rare, due to their dynamic  
394 repair, we next assessed whether *SORCS2* loss would have an effect on the number of DSBs  
395 following treatment with etoposide, which causes accumulation of Topoisomerase II $\beta$  (TopoII $\beta$ )-  
396 dependent DNA DSBs, by preventing their re-ligation through stabilisation of the TopoII $\beta$ -DNA  
397 cleavable complex (Montecucco et al 2015). As expected, etoposide treatment greatly increased the  
398 number of DSBs per nucleus in both wild-type and *SORCS2* knock-out LUHMES neurons ( $F_{1, 31} = 299$ ,  $p$   
399  $< 0.0001$ ; Fig. 3a [bottom row] and 3c) with the *SORCS2* knock-out lines having significantly more  
400  $\gamma$ H2A.X/53BP1-positive foci per nucleus than the wild-type lines (post-hoc  $p = 0.0355$ ; Fig. 3c). There  
401 was no significant difference in the number of  $\gamma$ H2A.X/53BP1-positive foci per nucleus between the  
402 *SORCS2* knock-out clones derived by targeting exon 1 and those generated by disrupting exon 3 ( $t_7 =$   
403  $0.2139$ ,  $p = 0.8367$ ; Fig. 3d), or between the two control groups ( $t_7 = 0.2535$ ,  $p = 0.8072$ , Suppl. Fig.  
404 3b).

405 Treatment with etoposide had no impact on *TOP2B* expression ( $F_{1, 16} = 0.9781$ ,  $p = 0.8391$ , Suppl. Fig.  
406 4). In addition, there was no significant difference in *TOP2B* levels between genotypes either prior to  
407 or following etoposide treatment ( $F_{1, 16} = 2.652$ ,  $p = 0.1230$ , Suppl. Fig. 4).

408 Given the link between neuronal activity and TopoII $\beta$ -mediated DNA damage (Madabhushi et al  
409 2015), we next investigated whether established paradigms of neuronal stimulation would have a  
410 differential impact on the formation of DNA DSBs in *SORCS2* knock-out and wild-type LUHMES  
411 neurons. First, we tested established neuronal activation agents, N-methyl-D-aspartate (NMDA),  
412 potassium chloride (KCl), and Glycine, in mature WT neurons to assess their effect on DSB  
413 generation in LUHMES. Brief treatments with NMDA (50 $\mu$ M) or KCl (10mM) had no effect on the  
414 number of  $\gamma$ H2A.X/53BP1-positive foci per nucleus, while incubation with glycine (300 $\mu$ M) led to a  
415 significant increase in the number of DNA breaks ( $p = 0.0001$ , Suppl. Fig. 5). We next compared the  
416 impact of glycine treatment in control (WT and EV) and *SORCS2*<sup>-/-</sup> lines. No significant difference in  
417 the number of DNA DSB foci was observed between the two groups ( $t_{14} = 0.3825$ ,  $p = 0.7078$ , Fig. 4).  
418 Finally, given the negative impact of DSB formation on neuronal function and survival, we examined  
419 the effect of knocking out *SORCS2* on the overall neuronal viability both at early (day 6) and late (day  
420 14) stages of differentiation. At day 6, there was no significant difference in the viability of wild-type  
421 neurons compared to that of the *SORCS2* knock-out clones ( $t_{16} = 0.2958$ ,  $p = 0.771$ ; Fig. 5a).  
422 However, at day 14, we detected a significant reduction in the viability of *SORCS2*<sup>-/-</sup> clones compared  
423 to controls ( $t_{15} = 3.387$ ,  $p = 0.004$ ; Fig. 5b).

## 424 Discussion

425 We provide the first, to our knowledge, replication of a previous finding (Suberbielle et al 2013) that,  
426 in wild-type mice, exploration of a novel environment is associated with the acquisition of DNA  
427 DSBs, which are repaired after a recovery period. We found, however, no evidence to support our  
428 initial hypothesis that *Sorcs2* knock-out mice would show a greater number of breaks associated  
429 with the exploratory behaviour or impaired recovery from this experience. In contrast, somewhat  
430 surprisingly, we observed higher levels of DNA damage in the DG of *Sorcs2*<sup>-/-</sup> mice that remained in  
431 their home cage. We subsequently replicated this result in an independent set of knock-out and  
432 wild-type mice.

433 We next investigated whether higher levels of DNA damage would be also found in human neurons  
434 lacking *SORCS2*. DNA DSBs were rare in both mutant and wild-type lines, as has been reported  
435 previously for rat primary cortical neurons (Crowe et al 2006), and there was no detectable  
436 difference in  $\gamma$ H2A.X immunoreactivity between the genotypes. As expected, treatment with the  
437 TopoII $\beta$  inhibitor, etoposide, led to an increase in the number of breaks in both lines. The *SORCS2*<sup>-/-</sup>  
438 lines, however, had significantly more breaks following etoposide treatment. Despite the increased  
439 number of TopoII $\beta$ -dependent breaks in the knock-out cell lines, there was no difference in *TOP2B*  
440 expression levels in mutant lines either before or after treatment with etoposide. As enhanced  
441 TopoII $\beta$  activity and DSB levels have been observed following stimulation of neuronal activity  
442 (Madabhushi et al 2015), we next investigated whether stimulation of neuronal activity would lead  
443 to a differential response in the neurons lacking *SORCS2*. We found no evidence that loss of *SORCS2*  
444 rendered the neurons more susceptible to neuronal activity-evoked DNA damage. This result is in  
445 keeping with our finding that *Sorcs2*<sup>-/-</sup> mice had a similar number of DNA DSBs to wild-type mice  
446 following exploration of a novel environment.

447 There are a number of potential explanations for the link between *SORCS2* loss and DNA damage.  
448 Previous work (Malik et al 2019) implicated *SorCS2* in protection against the oxidative stress-induced  
449 DNA damage and neuronal loss caused by a PTZ-induced kindling paradigm. Similarly, Smith *et al.*  
450 (2018) showed that *SORCS2* expression is stimulated by other stressors, such as alcohol and DEXA  
451 (Smith et al 2018). DEXA administration induces DNA damage, which can be prevented by  
452 application of reactive oxygen species (ROS) blockers (Ortega-Martínez 2015), thus *SORCS2* loss may  
453 exacerbate the effect of cellular stressors on DNA damage and future experiments could test this  
454 hypothesis. Another possibility is that *SORCS2* loss impacts the number of DNA DSBs, through loss of  
455 interaction with DNA repair proteins. *SORCS2* has been shown to co-localise with the transactivation  
456 response DNA-binding protein of 43kDa (TDP-43) in ALS post-mortem brains (Miki et al 2018). TDP-  
457 43 is an RNA/DNA-binding protein that has recently been implicated in DSB repair (Mitra et al 2019).  
458 *SORCS2* also interacts with Heterogeneous Nuclear Ribonucleoprotein U (hnRNP-U) (Fasci et al

459 2018). This DNA and RNA binding protein interacts with NEIL1, a DNA glycosylase implicated in the  
460 repair of DNA damaged by reactive oxygen species, stimulating its base excision activity (Hegde et al  
461 2012). Given the role of the VPS10P family in intracellular trafficking, future work could investigate  
462 whether SORCS2 is involved in trafficking the above proteins.

463 While the cellular mechanism underlying the increase in DNA DSBs associated with SORCS2 loss is  
464 still uncertain, it is of interest that mature (but not immature) *SORCS2*<sup>-/-</sup> neurons showed decreased  
465 viability, in keeping with findings in mouse primary neurons lacking *Sorcs2*, which show higher rates  
466 of apoptosis (independent of autophagy) when subject to lysosomal stressors (Almeida et al.,  
467 submitted). The maintenance of genome integrity is very important, particularly for post-mitotic  
468 long-lived cells, such as neurons, and DNA damage is linked to neurodegenerative disorders, ageing  
469 and decreased expression of genes important for brain maintenance and function (Madabhushi et al  
470 2015).

471 This study is subject to a number of limitations. An important factor is the small number of replicates  
472 performed for the animal-based experiments, in particular. It is notable however that the set up was  
473 sufficient to replicate Suberbielle et al.'s finding in wild-type mice undergoing the novel environment  
474 task (Suberbielle et al 2013) and that we replicated the finding of increased numbers of breaks in the  
475 mutant mice that remained in the home cage in an independent set of mice. It is also notable that  
476 experiments performed in mice and a human cell line lacking SORCS2 showed consistent  
477 phenotypes.

478 In summary, we have shown that *SorCS2* loss in mice leads to higher levels of  $\gamma$ H2A.X-positive DNA  
479 breaks. Loss of SORCS2 in human neurons led to an increase in the number of TopoII $\beta$ -dependent  
480 breaks and decreased neuronal viability. Our findings in both species suggest that the impact of  
481 SORCS2 loss is not mediated by a differing response to neuronal activation. An increase in DNA DSBs  
482 may lead to an altered transcriptional profile, affect genome integrity and ultimately lead to cell  
483 death. In agreement with this notion, DNA damage is increasingly being linked to cognitive

484 impairment, dementia and other neurodegenerative disorders (Mullaart et al 1990; Adamec et al  
485 1999; Madabhushi et al 2014; Shanbhag et al 2019; Thadathil et al 2019), and attenuating the DNA  
486 damage response to DSBs has been demonstrated to be protective in models of several  
487 neurodegenerative disorders (Tuxworth et al 2019). Our findings are in keeping with the known  
488 involvement of other sortilin family members in cognition, ageing and neurodegenerative disorders  
489 and with the recent finding that SNPs in *SORCS2* are involved in epistatic interactions associated with  
490 pathological hallmarks of Alzheimer's disease (Wang et al 2020). Future experimental work should  
491 assess hypotheses based around *SORCS2*'s role in the cellular response to stress and/or DNA repair  
492 pathways.

493

#### 494 **Abbreviations**

|     |               |                                          |
|-----|---------------|------------------------------------------|
| 495 | <b>53BP1:</b> | p53-binding protein 1                    |
| 496 | <b>ADHD:</b>  | Attention deficit hyperactivity disorder |
| 497 | <b>ALS:</b>   | Amyotrophic lateral sclerosis            |
| 498 | <b>BDNF:</b>  | Brain-derived neurotrophic factor        |
| 499 | <b>BSA:</b>   | Bovine serum albumin                     |
| 500 | <b>Ct:</b>    | Cycle threshold                          |
| 501 | <b>DEXA:</b>  | Dexamethasone                            |
| 502 | <b>DG:</b>    | Dentate gyrus                            |
| 503 | <b>DSB:</b>   | Double-strand break                      |
| 504 | <b>EV:</b>    | Empty vector                             |
| 505 | <b>FACS:</b>  | Fluorescence-activated cell sorting      |

|     |                 |                                                       |
|-----|-----------------|-------------------------------------------------------|
| 506 | <b>GDNF:</b>    | Glial cell-derived neurotrophic factor                |
| 507 | <b>gRNA:</b>    | Guide RNA                                             |
| 508 | <b>GWAS:</b>    | Genome-wide association study                         |
| 509 | <b>hnRNP-U:</b> | Heterogeneous nuclear ribonucleoprotein U             |
| 510 | <b>KCl:</b>     | Potassium chloride                                    |
| 511 | <b>KO:</b>      | Knock-out                                             |
| 512 | <b>LTD:</b>     | Long-term depression                                  |
| 513 | <b>LTP:</b>     | Long-term potentiation                                |
| 514 | <b>LUHMES:</b>  | Lund human mesencephalic                              |
| 515 | <b>MSN:</b>     | Medium spiny neurons                                  |
| 516 | <b>NHEJ:</b>    | Non-homologous end joining                            |
| 517 | <b>NMDAR:</b>   | N-methyl-D-aspartate receptor                         |
| 518 | <b>PBS:</b>     | Phosphate-buffered saline                             |
| 519 | <b>PLO:</b>     | Poly-L-Ornithine                                      |
| 520 | <b>PSD:</b>     | Post-synaptic density                                 |
| 521 | <b>PTZ:</b>     | Pentylentetrazol                                      |
| 522 | <b>ROS:</b>     | Reactive oxygen species                               |
| 523 | <b>SNP:</b>     | Single-nucleotide polymorphism                        |
| 524 | <b>TBS:</b>     | Tris-Buffered Saline                                  |
| 525 | <b>TDP-43:</b>  | Transactivation response DNA-binding protein of 43kDa |

526 **TH<sup>+</sup>**: Tyrosine hydroxylase-positive  
527 **TopoII $\beta$** : Topoisomerase II $\beta$   
528 **TrkB**: Tropomyosin receptor kinase B  
529 **Vps10p**: Vacuolar protein sorting (VPS) 10p  
530 **VTA**: Ventral tegmental area  
531 **WT**: Wild-type

532

### 533 **Acknowledgements**

534 We thank Dr Ian Adams for helpful discussions regarding scientific strategy and the manuscript  
535 and Dr James Crichton for support with protocol optimisation and helpful comments on the  
536 manuscript. KOG received salary support from an Alzheimer's Research UK award (ARUK-PPG2019B-  
537 015) to KLE. TSJ is funded by the UK Dementia Research Institute which receives its funding from DRI  
538 Ltd, funded by the UK Medical Research Council, Alzheimer's Society, and Alzheimer's Research UK,  
539 and the European Research Council (ERC) under the European Union's Horizon 2020 research and  
540 innovation programme (Grant agreement No. 681181).

541

### 542 **References**

543 **Adamec E, Vonsattel JP, Nixon RA (1999) DNA strand breaks in Alzheimer's disease. Brain Res**  
544 **849:67–77. doi: 10.1016/s0006-8993(99)02004-1**  
545 **Alemaný S, Ribasés M, Vilor-Tejedor N, et al (2015) New suggestive genetic loci and biological**  
546 **pathways for attention function in adult attention-deficit/hyperactivity disorder. Am J**  
547 **Med Genet B, Neuropsychiatr Genet 168:459–470. doi: 10.1002/ajmg.b.32341**  
548 **Crowe SL, Movsesyan VA, Jorgensen TJ, Kondratyev A (2006) Rapid phosphorylation of histone**  
549 **H2A.X following ionotropic glutamate receptor activation. Eur J Neurosci 23:2351–2361.**  
550 **doi: 10.1111/j.1460-9568.2006.04768.x**  
551 **Davies G, Lam M, Harris SE, et al (2018) Study of 300,486 individuals identifies 148 independent**  
552 **genetic loci influencing general cognitive function. Nat Commun 9:2098. doi:**  
553 **10.1038/s41467-018-04362-x**

- 554 Deinhardt K, Kim T, Spellman DS, et al (2011) Neuronal growth cone retraction relies on  
555 proneurotrophin receptor signaling through Rac. *Sci Signal* 4:ra82. doi:  
556 10.1126/scisignal.2002060
- 557 Duncan L, Yilmaz Z, Gaspar H, et al (2017) Significant Locus and Metabolic Genetic Correlations  
558 Revealed in Genome-Wide Association Study of Anorexia Nervosa. *Am J Psychiatry*  
559 174:850–858. doi: 10.1176/appi.ajp.2017.16121402
- 560 Fabbri C, Serretti A (2016) Genetics of long-term treatment outcome in bipolar disorder. *Prog*  
561 *Neuropsychopharmacol Biol Psychiatry* 65:17–24. doi: 10.1016/j.pnpbp.2015.08.008
- 562 Fabbri C, Tansey KE, Perlis RH, et al (2018) New insights into the pharmacogenomics of  
563 antidepressant response from the GENDEP and STAR\*D studies: rare variant analysis and  
564 high-density imputation. *Pharmacogenomics J* 18:413–421. doi: 10.1038/tpj.2017.44
- 565 Fasci D, van Ingen H, Scheltema RA, Heck AJR (2018) Histone interaction landscapes visualized by  
566 crosslinking mass spectrometry in intact cell nuclei. *Mol Cell Proteomics* 17:2018–2033.  
567 doi: 10.1074/mcp.RA118.000924
- 568 Firsanov DV, Solovjeva LV, Svetlova MP (2011) H2AX phosphorylation at the sites of DNA double-  
569 strand breaks in cultivated mammalian cells and tissues. *Clin Epigenetics* 2:283–297. doi:  
570 10.1007/s13148-011-0044-4
- 571 Glerup S, Bolcho U, Mølgaard S, et al (2016) SorCS2 is required for BDNF-dependent plasticity in  
572 the hippocampus. *Mol Psychiatry* 21:1740–1751. doi: 10.1038/mp.2016.108
- 573 Glerup S, Nykjaer A, Vaegter CB (2014a) Sortilins in neurotrophic factor signaling. *Handb Exp*  
574 *Pharmacol* 220:165–189. doi: 10.1007/978-3-642-45106-5\_7
- 575 Glerup S, Olsen D, Vaegter CB, et al (2014b) SorCS2 regulates dopaminergic wiring and is processed  
576 into an apoptotic two-chain receptor in peripheral glia. *Neuron* 82:1074–1087. doi:  
577 10.1016/j.neuron.2014.04.022
- 578 Greenwood TA, Lazzeroni LC, Maihofer AX, et al (2019) Genome-wide Association of  
579 Endophenotypes for Schizophrenia From the Consortium on the Genetics of Schizophrenia  
580 (COGS) Study. *JAMA Psychiatry* 76:1274–1284. doi: 10.1001/jamapsychiatry.2019.2850
- 581 Hegde ML, Banerjee S, Hegde PM, et al (2012) Enhancement of NEIL1 protein-initiated oxidized  
582 DNA base excision repair by heterogeneous nuclear ribonucleoprotein U (hnRNP-U) via  
583 direct interaction. *J Biol Chem* 287:34202–34211. doi: 10.1074/jbc.M112.384032
- 584 Hermey G (2009) The Vps10p-domain receptor family. *Cell Mol Life Sci* 66:2677–2689. doi:  
585 10.1007/s00018-009-0043-1
- 586 Karlsson Linnér R, Biroli P, Kong E, et al (2019) Genome-wide association analyses of risk tolerance  
587 and risky behaviors in over 1 million individuals identify hundreds of loci and shared  
588 genetic influences. *Nat Genet* 51:245–257. doi: 10.1038/s41588-018-0309-3
- 589 Lotharius J, Barg S, Wiekop P, et al (2002) Effect of mutant alpha-synuclein on dopamine  
590 homeostasis in a new human mesencephalic cell line. *J Biol Chem* 277:38884–38894. doi:  
591 10.1074/jbc.M205518200
- 592 Ma Q, Yang J, Milner TA, et al (2017) SorCS2-mediated NR2A trafficking regulates motor deficits in  
593 Huntington’s disease. *JCI Insight*. doi: 10.1172/jci.insight.88995



- 594 **Madabhushi R, Gao F, Pfenning AR, et al (2015) Activity-Induced DNA Breaks Govern the**  
595 **Expression of Neuronal Early-Response Genes. *Cell* 161:1592–1605. doi:**  
596 **10.1016/j.cell.2015.05.032**
- 597 **Madabhushi R, Pan L, Tsai L-H (2014) DNA damage and its links to neurodegeneration. *Neuron***  
598 **83:266–282. doi: 10.1016/j.neuron.2014.06.034**
- 599 **Malik AR, Szydłowska K, Nizinska K, et al (2019) SorCS2 Controls Functional Expression of Amino**  
600 **Acid Transporter EAAT3 and Protects Neurons from Oxidative Stress and Epilepsy-Induced**  
601 **Pathology. *Cell Rep* 26:2792–2804.e6. doi: 10.1016/j.celrep.2019.02.027**
- 602 **Miki Y, Mori F, Seino Y, et al (2018) Colocalization of Bunina bodies and TDP-43 inclusions in a case**  
603 **of sporadic amyotrophic lateral sclerosis with Lewy body-like hyaline inclusions.**  
604 ***Neuropathology* 38:521–528. doi: 10.1111/neup.12484**
- 605 **Mitra J, Guerrero EN, Hegde PM, et al (2019) Motor neuron disease-associated loss of nuclear TDP-**  
606 **43 is linked to DNA double-strand break repair defects. *Proc Natl Acad Sci USA* 116:4696–**  
607 **4705. doi: 10.1073/pnas.1818415116**
- 608 **Montecucco A, Zanetta F, Biamonti G (2015) Molecular mechanisms of etoposide. *EXCLI J* 14:95–**  
609 **108. doi: 10.17179/excli2015-561**
- 610 **Mullaart E, Boerrigter ME, Ravid R, et al (1990) Increased levels of DNA breaks in cerebral cortex of**  
611 **Alzheimer’s disease patients. *Neurobiol Aging* 11:169–173. doi: 10.1016/0197-**  
612 **4580(90)90542-8**
- 613 **Olsen D, Kaas M, Lundhede J, et al (2019) Reduced alcohol seeking and withdrawal symptoms in**  
614 **mice lacking the BDNF receptor sorcs2. *Front Pharmacol* 10:499. doi:**  
615 **10.3389/fphar.2019.00499**
- 616 **Olsen D, Wellner N, Kaas M, et al (2021) Altered dopaminergic firing pattern and novelty response**  
617 **underlie ADHD-like behavior of SorCS2-deficient mice. *Transl Psychiatry* 11:74. doi:**  
618 **10.1038/s41398-021-01199-9**
- 619 **Ortega-Martínez S (2015) Dexamethasone acts as a radiosensitizer in three astrocytoma cell lines**  
620 **via oxidative stress. *Redox Biol* 5:388–397. doi: 10.1016/j.redox.2015.06.006**
- 621 **Rampersad SN (2012) Multiple applications of Alamar Blue as an indicator of metabolic function**  
622 **and cellular health in cell viability bioassays. *Sensors (Basel)* 12:12347–12360. doi:**  
623 **10.3390/s120912347**
- 624 **Scholz D, Pörtl D, Genewsky A, et al (2011) Rapid, complete and large-scale generation of post-**  
625 **mitotic neurons from the human LUHMES cell line. *J Neurochem* 119:957–971. doi:**  
626 **10.1111/j.1471-4159.2011.07255.x**
- 627 **Shanbhag NM, Evans MD, Mao W, et al (2019) Early neuronal accumulation of DNA double strand**  
628 **breaks in Alzheimer’s disease. *Acta Neuropathol Commun* 7:77. doi: 10.1186/s40478-019-**  
629 **0723-5**
- 630 **Smith AH, Ovesen PL, Skeldal S, et al (2018) Risk locus identification ties alcohol withdrawal**  
631 **symptoms to SORCS2. *Alcohol Clin Exp Res* 42:2337–2348. doi: 10.1111/acer.13890**
- 632 **Suberbielle E, Sanchez PE, Kravitz AV, et al (2013) Physiologic brain activity causes DNA double-**  
633 **strand breaks in neurons, with exacerbation by amyloid- $\beta$ . *Nat Neurosci* 16:613–621. doi:**  
634 **10.1038/nn.3356**

635 Thadathil N, Hori R, Xiao J, Khan MM (2019) DNA double-strand breaks: a potential therapeutic  
636 target for neurodegenerative diseases. *Chromosome Res* 27:345–364. doi:  
637 10.1007/s10577-019-09617-x

638 Tuxworth RI, Taylor MJ, Martin Anduaga A, et al (2019) Attenuating the DNA damage response to  
639 double-strand breaks restores function in models of CNS neurodegeneration. *Brain*  
640 *Commun* 1:fcz005. doi: 10.1093/braincomms/fcz005

641 Wang H, Yang J, Schneider JA, et al (2020) Genome-wide interaction analysis of pathological  
642 hallmarks in Alzheimer's disease. *Neurobiol Aging* 93:61–68. doi:  
643 10.1016/j.neurobiolaging.2020.04.025

644 Yang J, Ma Q, Dincheva I, et al (2020) SorCS2 is required for social memory and trafficking of the  
645 NMDA receptor. *Mol Psychiatry*. doi: 10.1038/s41380-020-0650-7

646

647

## 648 Figure Legends

649 **Fig. 1** Exploration of a novel environment is associated with a transient increase in DSBs in the  
650 dentate gyrus and the CA2. (a) Experimental design. WT and *Sorcs2*<sup>-/-</sup> mice were divided into three  
651 groups: 'home cage' (white), 'Novel E' (novel environment; light grey) and 'recovery' (dark grey). (b)  
652 For each brain region, the percentages of  $\gamma$ H2A.X-positive nuclei was calculated in 5-6 month-old WT  
653 (open bars) and *Sorcs2*<sup>-/-</sup> mice (dotted bars) belonging to one of the three experimental groups.  
654 Three brain sections per region per mouse, n=3 per experimental group. \*p<0.05; \*\*p<0.01;  
655 \*\*\*\*p<0.0001 (Two-way ANOVA, followed by Tukey's multiple comparisons test). (c) Percentage of  
656 nuclei positive for  $\gamma$ H2A.X in the DG of wild-type (open bars) and *Sorcs2*<sup>-/-</sup> (dotted bars) mice in a  
657 replication study. Three brain sections per region per mouse, n=7-5. \*p<0.05 (unpaired Student's t-  
658 test). Error bars represent means  $\pm$  SEM Error bars represent means  $\pm$  SEM

659 **Fig. 2** Strategy for knocking out *SORCS2* in LUHMES using CRISPR/Cas9 genome editing. (a)  
660 Experimental design of the CRISPR/Cas9 experiments. gRNA sequences (underlined) within *SORCS2*  
661 exon 1 and exon 3 used (separately) to knock out the gene using CRISPR/Cas9 genome editing.  
662 Created with BioRender.com. (b) Representative western blots show a complete loss of SORCS2 in  
663 the KO clones after targeting exon 1 (n=4 independent cell lines) or exon 3 (n=5 independent lines)

664 **Fig. 3** Knocking out *SORCS2* leads to increased TopoII $\beta$ -dependent DSB formation in LUHMES  
665 neurons. (a) Representative confocal images from untreated (top row) and etoposide-treated  
666 (bottom row) WT and *SORCS2* KO LUHMES neurons (day 14) immunostained with  $\gamma$ H2A.X (green)  
667 and 53BP1 (red), and counterstained with DAPI (blue). White arrows point towards  $\gamma$ H2A.X/53BP1  
668 dual positive foci, and red- towards foci positive for  $\gamma$ H2A.X only. Images were taken at 100x  
669 magnification; scale bars: 10  $\mu$ m. (b) Number of DSBs ( $\gamma$ H2A.X/53BP1-positive foci) per nucleus in  
670 untreated WT (white bar) and *SORCS2* KO (grey bar) LUHMES neurons (day 14); n= 8- 9 independent  
671 cell lines per genotype. Unpaired Student's t-test. (c) Number of DSBs ( $\gamma$ H2A.X/53BP1-positive foci)  
672 per nucleus in etoposide-treated (dotted bars) compared to untreated (open bars) WT (white bars)  
673 and *SORCS2* KO (grey bars) LUHMES neurons (day 14); n=9 independent lines per genotype. \*p<0.05;  
674 \*\*\*\*p<0.0001 (Two-way ANOVA, followed by Sidak's multiple comparisons test). (d) Number of  
675 DSBs ( $\gamma$ H2A.X/53BP1-positive foci) per nucleus in etoposide-treated *SORCS2* KO LUHMES neurons  
676 (day 14) generated by targeting exon 1 (n=4 independent cell lines) or exon 3 (n=5 independent cell  
677 lines). Unpaired Student's t-test. Approximately 100 nuclei counted per cell line; error bars represent  
678 means  $\pm$  SEM

679 **Fig. 4** Treatment with Glycine has no differential effect on DNA DSB formation in *SORCS2* KO  
680 LUHMES neurons. No significant difference in the number of DSBs ( $\gamma$ H2A.X/53BP1-positive foci) per  
681 nucleus was identified between WT (white bar) and *SORCS2* KO (grey bar) LUHMES neurons (day 14)  
682 following treatment with Glycine. N = 8 independent cell lines per genotype. Unpaired Student's t-  
683 test

684 **Fig. 5** Knocking out *SORCS2* is associated with decreased neuronal viability at late (day 14), but not  
685 early (day 6) stages of neuronal differentiation. Neuronal viability of WT (white bar) and *SORCS2* KO  
686 (grey bar) LUHMES neurons measured at early (day 6) (a) and late (day 14) (b) stages of  
687 differentiation. \*\*p<0.01 (unpaired Student's t-test); Error bars represent means  $\pm$  SEM; n=8-9  
688 independent cell lines per genotype

689 **Suppl. Fig. 1** Schematic representation of the areas of the hippocampus immunostained for  $\gamma$ H2A.X  
690 and counterstained with DAPI. Three 14 $\mu$ m thick sections were obtained at intervals of 700 $\mu$ m,  
691 starting from the first section in which all regions of the hippocampus (i.e. CA1, CA2 and CA3) was  
692 visible. This corresponds to bregmas -1.755, -2.155 and -2.555. Confocal images were obtained  
693 within the DG, CA2 and CA3 regions as indicated by boxes A, B and C, respectively. Created with  
694 BioRender.com

695 **Suppl. Fig. 2** DSB formation in WT and *Sorcs2*<sup>-/-</sup> mice at baseline, following exploratory activity and  
696 recovery in the home cage. Single planes from the maximum projections of representative confocal  
697 images taken from the DG of WT (top row) and *Sorcs2*<sup>-/-</sup> (bottom row) mice belonging to one of the  
698 three experimental conditions- home cage (left column), novel environment (middle column) and  
699 recovery (right column).  $\gamma$ H2A.X-positive foci (green) were localised within nuclei (blue). When  
700 counting positive nuclei, due to the high nuclei density, each plane was examined individually. The  
701 nuclei positive for  $\gamma$ H2A.X in each plane were marked while counting to avoid oversampling. White  
702 and red arrows point towards  $\gamma$ H2A.X-positive and negative nuclei, respectively. 60x magnification;  
703 scale bars: 10 $\mu$ m

704 **Suppl. Fig. 3** DSB formation in WT and *SORCS2* KO LUHMES neurons. Number of DSBs  
705 ( $\gamma$ H2A.X/53BP1-positive foci) per nucleus in untreated (a) and etoposide-treated (b) WT (n= 6  
706 independent cell lines) and EV (n= 3 independent cell lines) LUHMES neuron day 14. (c) Number of  
707 DSBs ( $\gamma$ H2A.X/53BP1-positive foci) per nucleus in untreated *SORCS2* KO LUHMES neurons (day 14)  
708 generated by targeting exon 1 (n=4 independent cell lines) or exon 3 (n=5 independent cell lines).  
709 Unpaired Student's t-test. Approximately 100 nuclei counted per cell line. Error bars represent  
710 means  $\pm$  SEM

711 **Suppl. Fig. 4** Knocking out *SORCS2* has no effect on *TOP2B* expression levels. *TOP2B* expression levels  
712 in untreated (open bars) and etoposide-treated (dotted bars) WT and *SORCS2* KO LUHMES neurons  
713 (day 14). *TOP2B* expression was normalised to the expression of two reference genes- *SDHA* and

714 *UBE4A*; No significant effect of the treatment ( $F_{2,16} = 0.9781$ ,  $p = 0.3374$ ), the genotype ( $F_{2,16} = 2.652$ ,  
 715  $p = 0.1230$ ) or the interaction between the two ( $F_{2,16} = 0.0426$ ,  $p = 0.8391$ ) was identified (Two-way  
 716 ANOVA).  $N = 4-6$  independent WT and *SORCS2* KO lines, respectively; error bars represent means  $\pm$   
 717 SEM

718 **Suppl. Fig. 5** Glycine treatment is associated with increased DSB formation in LUHMES neurons.  
 719 Number of DSBs ( $\gamma$ H2A.X/53BP1-positive foci) per nucleus in untreated, NMDA, KCl or Glycine  
 720 treated WT LUHMES neurons (day 14). Cells were treated with: NMDA (50 $\mu$ M) for 10 min, followed  
 721 by a 10min recovery in differentiation media or for 30min without recovery (NMDA'); KCl (10mM)  
 722 for 20 min; Glycine (300 $\mu$ M) in  $Mg^{2+}$  free ACSF for 5min, followed by 15min recovery in ACSF with  
 723  $Mg^{2+}$ . \*\*\*\* $p < 0.0001$  (One-way ANOVA, followed Dunnett's multiple comparisons test).  $N = 2-3$   
 724 independent WT lines, approximately 100 nuclei counted per cell line. Error bars represent means  $\pm$   
 725 SEM

726

727 **Suppl. Table 1** Mean and standard deviation of the percentage  $\gamma$ H2A.X-positive neurons in the DG,  
 728 the CA2 and CA3 region of the hippocampus of wild-type and *Sorcs2*<sup>-/-</sup> mice belonging to one of the  
 729 three experimental groups- home cage, novel environment and recovery

| Condition                               | Dentate gyrus |                    | CA2         |                    | CA3      |                    |
|-----------------------------------------|---------------|--------------------|-------------|--------------------|----------|--------------------|
|                                         | Mean %        | Standard deviation | Mean %      | Standard deviation | Mean %   | Standard deviation |
| <b>Wild-type mice</b>                   |               |                    |             |                    |          |                    |
| Home cage                               | 34.25938      | 3.951661           | 33.78725    | 6.976048           | 40.67963 | 10.46187           |
| Novel environment                       | 58.04647      | 2.134649           | 57.94746476 | 3.457886           | 58.03865 | 4.167395           |
| Recovery                                | 41.73074      | 1.907175           | 34.57381    | 5.601357           | 38.47548 | 8.155732           |
| <b><i>Sorcs2</i><sup>-/-</sup> mice</b> |               |                    |             |                    |          |                    |
| Home cage                               | 46.31996      | 3.340785           | 40.51054    | 14.16338           | 52.21577 | 5.153943           |
| Novel environment                       | 52.01193      | 4.919772           | 51.62685    | 4.597567           | 52.00494 | 1.386886           |
| Recovery                                | 45.15117      | 0.915894           | 39.75985    | 13.88005           | 46.00351 | 7.454623           |

730

731

732

733

**Figure 1**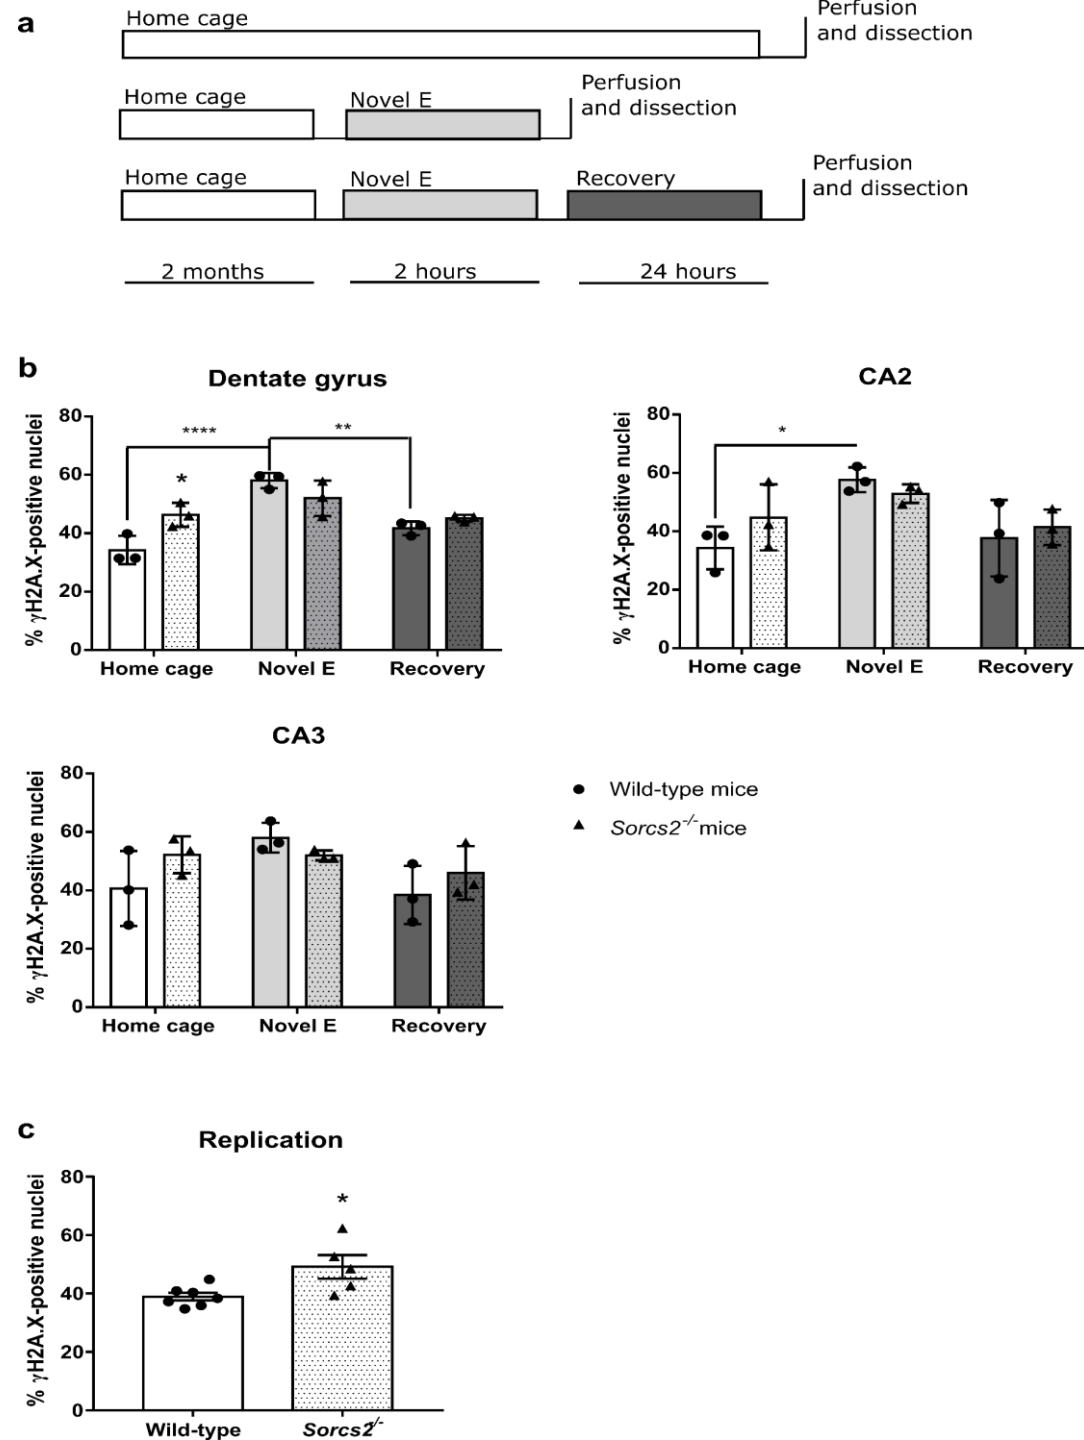

**Figure 2 a**

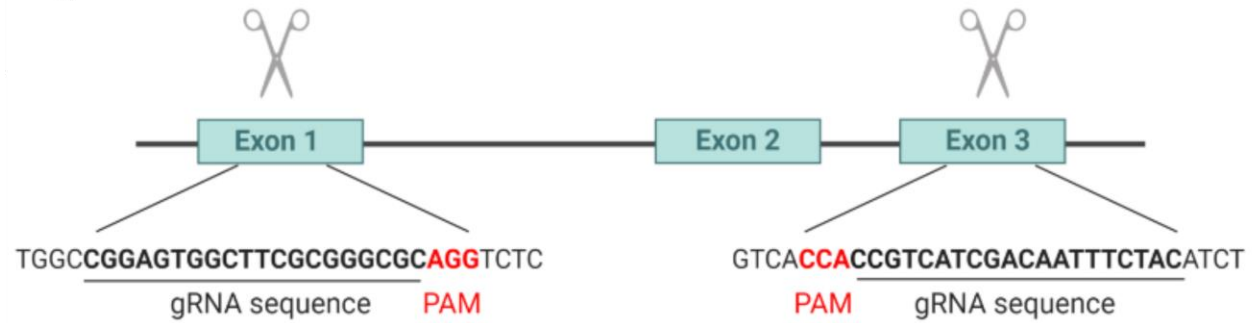

**b**

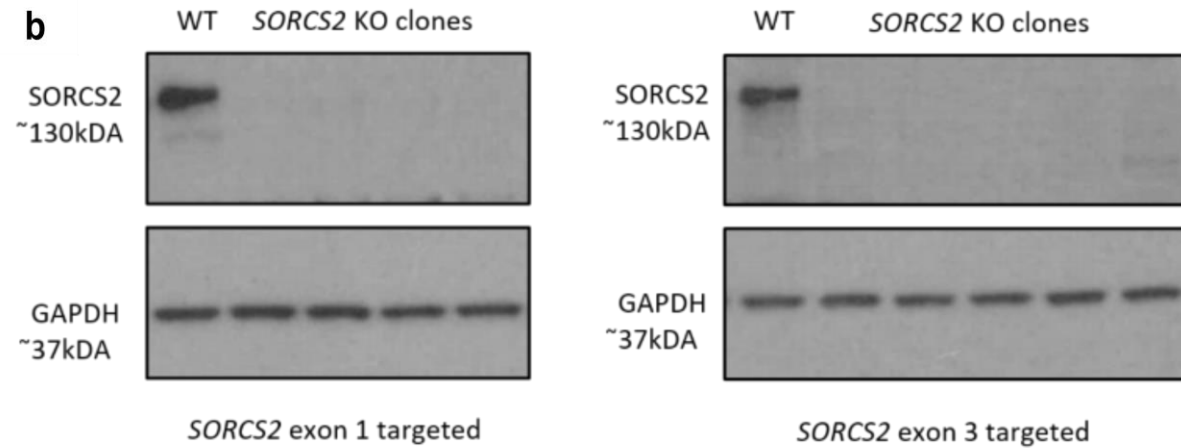



**Figure 3**

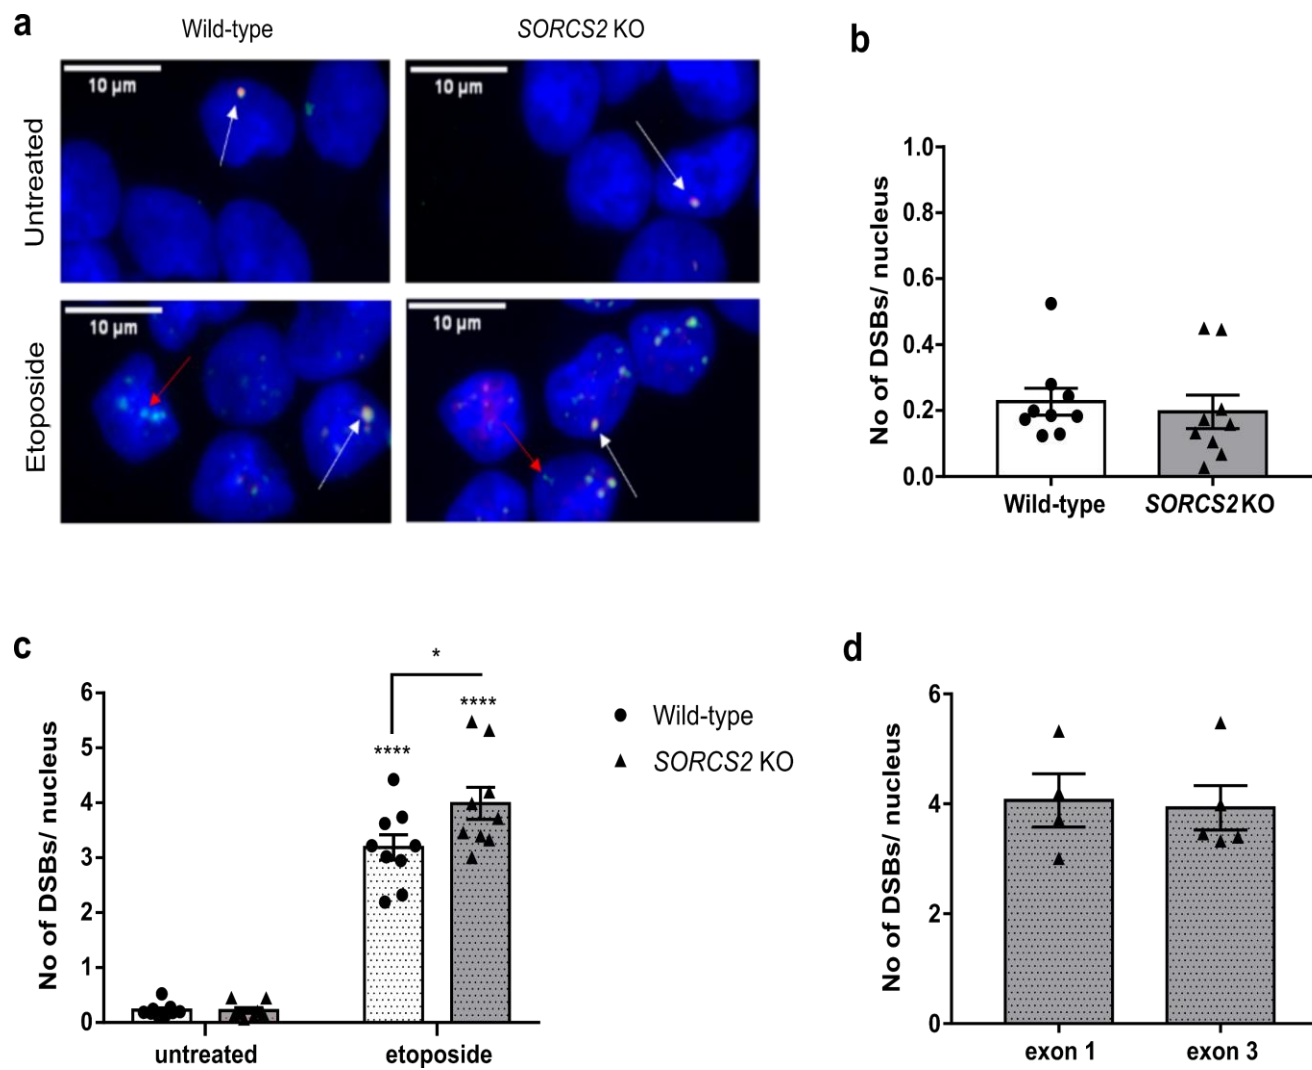

**Figure 4**

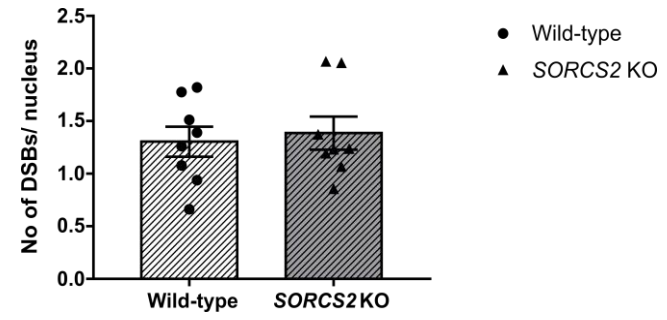

**Figure 5 a**

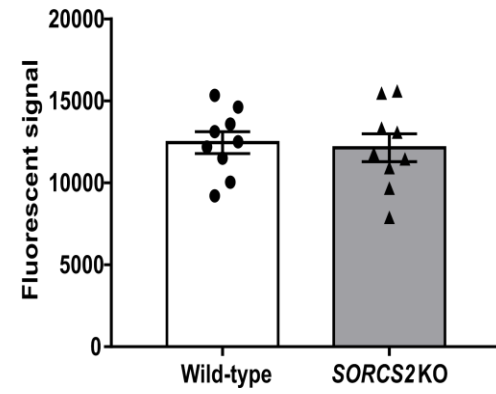

**b**

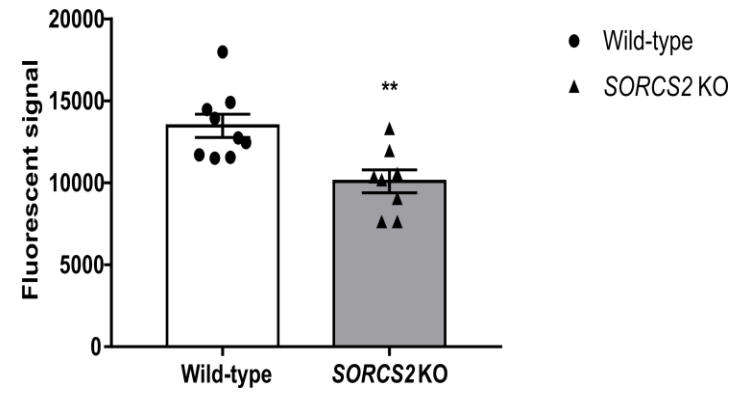

Source: http://biorxiv.org/content/10.1101/2021.04.28.441600v1.full.pdf
